# Supplementary material for: Insights Into Culturomics of the Rumen Microbiome
Source: PubMed Central journal article supplement (PMC6123358; doi:10.3389/fmicb.2018.01999), 2018-08-29
Supplement: Table_2.pdf [file Table_2.pdf]

**Table S2. List of genera with reported cultured rumen isolates and not reported but identified in this study**

\* marked detected in the rumen only for genera detected as cultivable in our study

| Phylum         | Rumen Bacterial Genera | Reported cultured isolate (Creevey et al.) | Identified in this study | Detected in Rumen sample (*) |
|----------------|------------------------|--------------------------------------------|--------------------------|------------------------------|
| Actinobacteria | Actinomyces            | +                                          | +                        | +                            |
| Actinobacteria | Atopobium              | +                                          | -                        | -                            |
| Actinobacteria | Bifidobacterium        | +                                          | +                        | +                            |
| Actinobacteria | Cellulomonas           | +                                          | -                        | -                            |
| Actinobacteria | Corynebacterium        | +                                          | +                        | +                            |
| Actinobacteria | Denitrobacterium       | +                                          | -                        | -                            |
| Actinobacteria | Georgenia              | -                                          | +                        | -                            |
| Actinobacteria | Micrococcus            | -                                          | +                        | +                            |
| Actinobacteria | Micromonospora         | +                                          | -                        | -                            |
| Actinobacteria | Olsenella              | +                                          | -                        | -                            |
| Actinobacteria | Prausurella            | +                                          | -                        | -                            |
| Actinobacteria | Propionibacterium      | +                                          | -                        | -                            |
| Actinobacteria | Slackia                | +                                          | -                        | -                            |
| Bacteroidetes  | 5-7N15                 | -                                          | +                        | -                            |
| Bacteroidetes  | Bacteroides            | +                                          | +                        | +                            |
| Bacteroidetes  | CF231                  | -                                          | +                        | +                            |
| Bacteroidetes  | Parabacteroides        | -                                          | +                        | +                            |
| Bacteroidetes  | Porphyromonas          | +                                          | -                        | -                            |
| Bacteroidetes  | Prevotella             | +                                          | +                        | +                            |
| Bacteroidetes  | Ruminobacillus         | +                                          | -                        | -                            |
| Bacteroidetes  | Ruminofilibacter       | +                                          | -                        | -                            |
| Bacteroidetes  | Sphingobacterium       | +                                          | -                        | -                            |
| Bacteroidetes  | YRC22                  | -                                          | +                        | +                            |
| Fibrobacteres  | Fibrobacter            | +                                          | -                        | -                            |
| Firmicutes     | 02d06                  | -                                          | +                        | +                            |
| Firmicutes     | Acetitomaculum         | +                                          | -                        | -                            |
| Firmicutes     | Acidaminococcus        | +                                          | -                        | -                            |
| Firmicutes     | Aerococcus             | -                                          | +                        | +                            |
| Firmicutes     | Alkaliphilus           | -                                          | +                        | +                            |
| Firmicutes     | Allisonella            | +                                          | -                        | -                            |
| Firmicutes     | Anaerobacillus         | -                                          | +                        | -                            |
| Firmicutes     | Anaerovibrio           | +                                          | +                        | +                            |
| Firmicutes     | Anaerovorax            | +                                          | +                        | +                            |
| Firmicutes     | Anoxybacillus          | -                                          | +                        | -                            |
| Firmicutes     | Bacillus               | +                                          | +                        | +                            |
| Firmicutes     | Blautia                | +                                          | +                        | +                            |
| Firmicutes     | Butyrivibrio           | +                                          | +                        | +                            |
| Firmicutes     | Cellulosilyticum       | +                                          | -                        | -                            |
| Firmicutes     | Clostridium            | +                                          | +                        | +                            |
| Firmicutes     | Coprococcus            | +                                          | +                        | +                            |
| Firmicutes     | Desemzia               | -                                          | +                        | +                            |
| Firmicutes     | Desulfotomaculum       | +                                          | -                        | -                            |

|            |                       |   |   |   |
|------------|-----------------------|---|---|---|
| Firmicutes | Dorea                 | - | + | + |
| Firmicutes | Enterococcus          | + | + | + |
| Firmicutes | Eubacterium           | + | + | + |
| Firmicutes | Exiguobacterium       | - | + | + |
| Firmicutes | Facklamia             | - | + | + |
| Firmicutes | Garciella             | - | + | - |
| Firmicutes | Helcococcus           | - | + | - |
| Firmicutes | Howardella            | + | - | - |
| Firmicutes | Kandleria             | + | - | - |
| Firmicutes | Lachnobacterium       | + | - | - |
| Firmicutes | Lachnospira           | + | - | - |
| Firmicutes | Lactobacillus         | + | + | + |
| Firmicutes | Lactococcus           | + | - | - |
| Firmicutes | Lentibacillus         | - | + | + |
| Firmicutes | Leuconostoc           | + | - | - |
| Firmicutes | Macrococcus           | - | + | - |
| Firmicutes | Megasphaera           | + | - | - |
| Firmicutes | Mitsuokella           | + | - | - |
| Firmicutes | Mogibacterium         | - | + | + |
| Firmicutes | Moryella              | - | + | + |
| Firmicutes | Natronobacillus       | - | + | - |
| Firmicutes | Oribacterium          | + | - | - |
| Firmicutes | Oscillibacter         | + | - | - |
| Firmicutes | Oxobacter             | + | - | - |
| Firmicutes | p-75-a5               | - | + | + |
| Firmicutes | Paenibacillus         | + | + | + |
| Firmicutes | Pediococcus           | + | - | - |
| Firmicutes | Peptoniphilus         | + | - | - |
| Firmicutes | Peptostreptococcus    | + | - | + |
| Firmicutes | Phascolarctobacterium | - | + | + |
| Firmicutes | Proteiniclasticum     | + | + | + |
| Firmicutes | Pseudobutyrvibrio     | + | + | + |
| Firmicutes | Quinella              | + | - | - |
| Firmicutes | RFN20                 | - | + | + |
| Firmicutes | Roseburia             | - | + | + |
| Firmicutes | Ruminococcus          | + | + | - |
| Firmicutes | Saccharofermentans    | + | - | - |
| Firmicutes | Sarcina               | + | - | - |
| Firmicutes | Schwartzia            | + | - | - |
| Firmicutes | Sedimentibacter       | - | + | + |
| Firmicutes | Selenomonas           | + | - | - |
| Firmicutes | Sharpea               | + | + | + |
| Firmicutes | Shuttleworthia        | - | + | + |
| Firmicutes | SMB53                 | - | + | + |
| Firmicutes | Sporanaerobacter      | - | + | + |
| Firmicutes | Staphylococcus        | + | + | + |
| Firmicutes | Streptococcus         | + | + | + |
| Firmicutes | Succiniclasticum      | + | + | + |
| Firmicutes | Syntrophococcus       | + | - | - |
| Firmicutes | Tepidimicrobium       | - | + | + |
| Firmicutes | Tetragenococcus       | - | + | + |

|                |                    |                       |   |   |
|----------------|--------------------|-----------------------|---|---|
| Firmicutes     | Tissierella        | +                     | + | + |
| Firmicutes     | Trichococcus       | -                     | + | + |
| Firmicutes     | Turicibacter       | -                     | + | + |
| Firmicutes     | Veillonella        | +                     | + | - |
| Firmicutes     | Virgibacillus      | -                     | + | + |
| Firmicutes     | Weissella          | -                     | + | - |
| Fusobacteria   | Fusobacterium      | +                     | + | - |
| Proteobacteria | Acinetobacter      | +                     | + | + |
| Proteobacteria | Actinobacillus     | +                     | - | - |
| Proteobacteria | Alysiella          | +                     | - | - |
| Proteobacteria | Ancylobacter       | +                     | - | - |
| Proteobacteria | Basfia             | +                     | - | - |
| Proteobacteria | Brenneria          | -                     | + | - |
| Proteobacteria | Campylobacter      | +                     | + | - |
| Proteobacteria | Desulfovibrio      | +                     | - | - |
| Proteobacteria | Enhydrobacter      | -                     | + | + |
| Proteobacteria | Enterobacter       | -                     | + | + |
| Proteobacteria | Erwinia            | -                     | + | - |
| Proteobacteria | Escherichia        | +                     | - | - |
| Proteobacteria | Janthinobacterium  | -                     | + | + |
| Proteobacteria | Klebsiella         | +                     | - | - |
| Proteobacteria | Lampropedia        | +                     | - | - |
| Proteobacteria | Mannheimia         | +                     | - | - |
| Proteobacteria | Oxalobacter        | +                     | - | - |
| Proteobacteria | Paracoccus         | -                     | + | + |
| Proteobacteria | Pelomonas          | -                     | + | + |
| Proteobacteria | Pigmentiphaga      | +                     | - | - |
| Proteobacteria | Proteus            | +                     | - | - |
| Proteobacteria | Providencia        | -                     | + | + |
| Proteobacteria | Pseudomonas        | +                     | + | + |
| Proteobacteria | Ralstonia          | -                     | + | + |
| Proteobacteria | Ruminobacter       | +                     | + | + |
| Proteobacteria | Salmonella         | -                     | + | + |
| Proteobacteria | Shigella           | +                     | - | - |
| Proteobacteria | Succinimonas       | +                     | - | - |
| Proteobacteria | Succinivibrio      | +                     | - | - |
| Proteobacteria | Sutterella         | -                     | + | + |
| Proteobacteria | Trabulsiella       | -                     | + | - |
| Proteobacteria | Wolinella          | +                     | - | - |
| Spirochaetes   | Treponema          | +                     | + | + |
| Synergistetes  | Synergistes        | +                     | - | - |
| Synergistetes  | Pyramidobacter     | -                     | + | + |
| Tenericutes    | Anaeroplasma       | +                     | - | - |
| Tenericutes    | Asteroleplasma     | +                     | - | - |
| <b>Archaea</b> |                    |                       |   |   |
| Euryarchaeota  | vadinCA11          | Archeae not mentioned | + | + |
| Euryarchaeota  | Methanobrevibacter | Archeae not mentioned | + | + |
